# Supplementary material for: Proteomic and Metabolomic Analysis of Bone Marrow and Plasma from Patients with Extramedullary Multiple Myeloma Identifies Distinct Protein and Metabolite Signatures
Source: MDPI journal article supplement (doi:10.3390/cancers15153764), 2023-07-25
Supplement: s1 [file s1]

# Supplementary Materials: Proteomic and Metabolomic Analysis of Bone Marrow and Plasma from Patients with Extramedullary Multiple Myeloma Identifies Distinct Protein and Metabolite Signatures

Katie Dunphy, Despina Bazou, Michael Henry, Paula Meleady, Juho J. Miettinen, Caroline A. Heckman, Paul Dowling and Peter O’Gorman

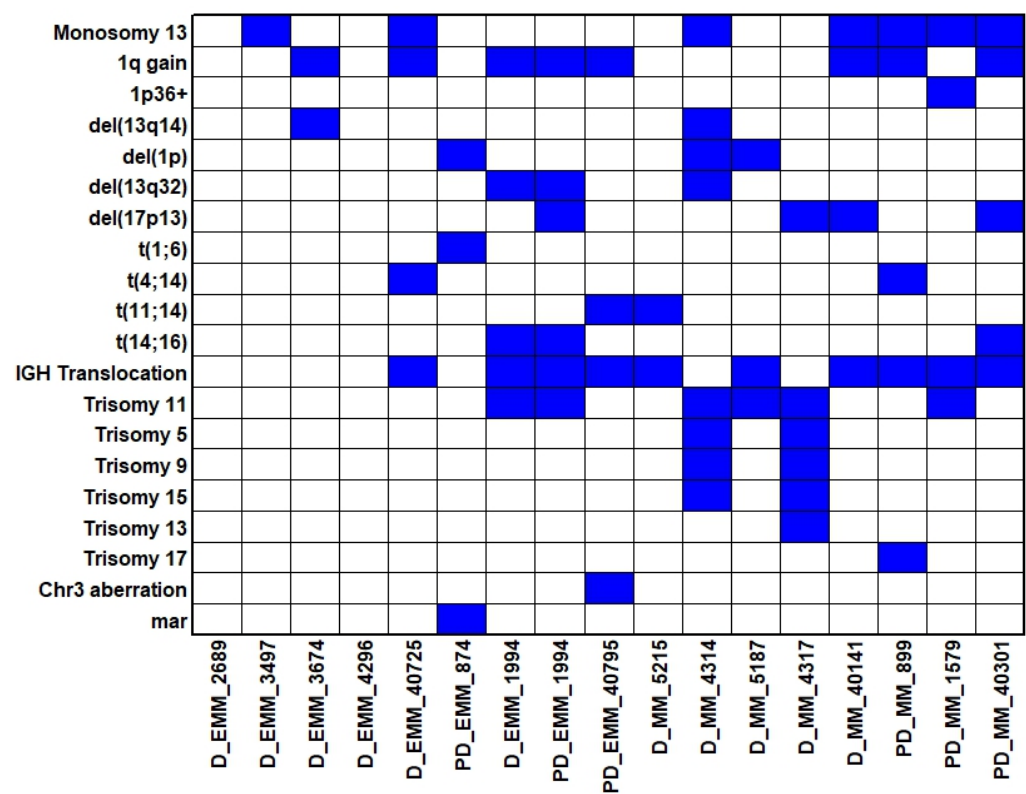

Figure S1. Cytogenetics of patient cohort.

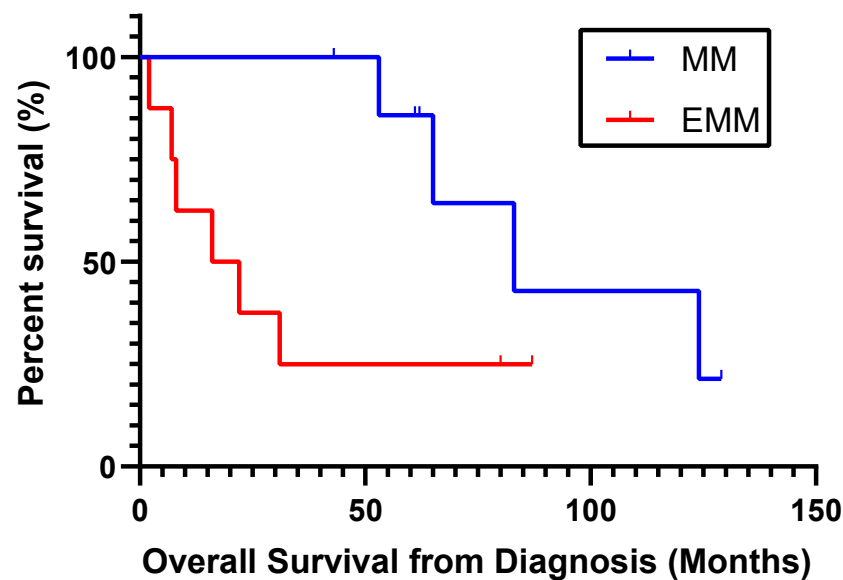

**Figure S2.** Survival graph illustrating the difference in OS between the EMM group (n=8) and medullary MM group (n=8).

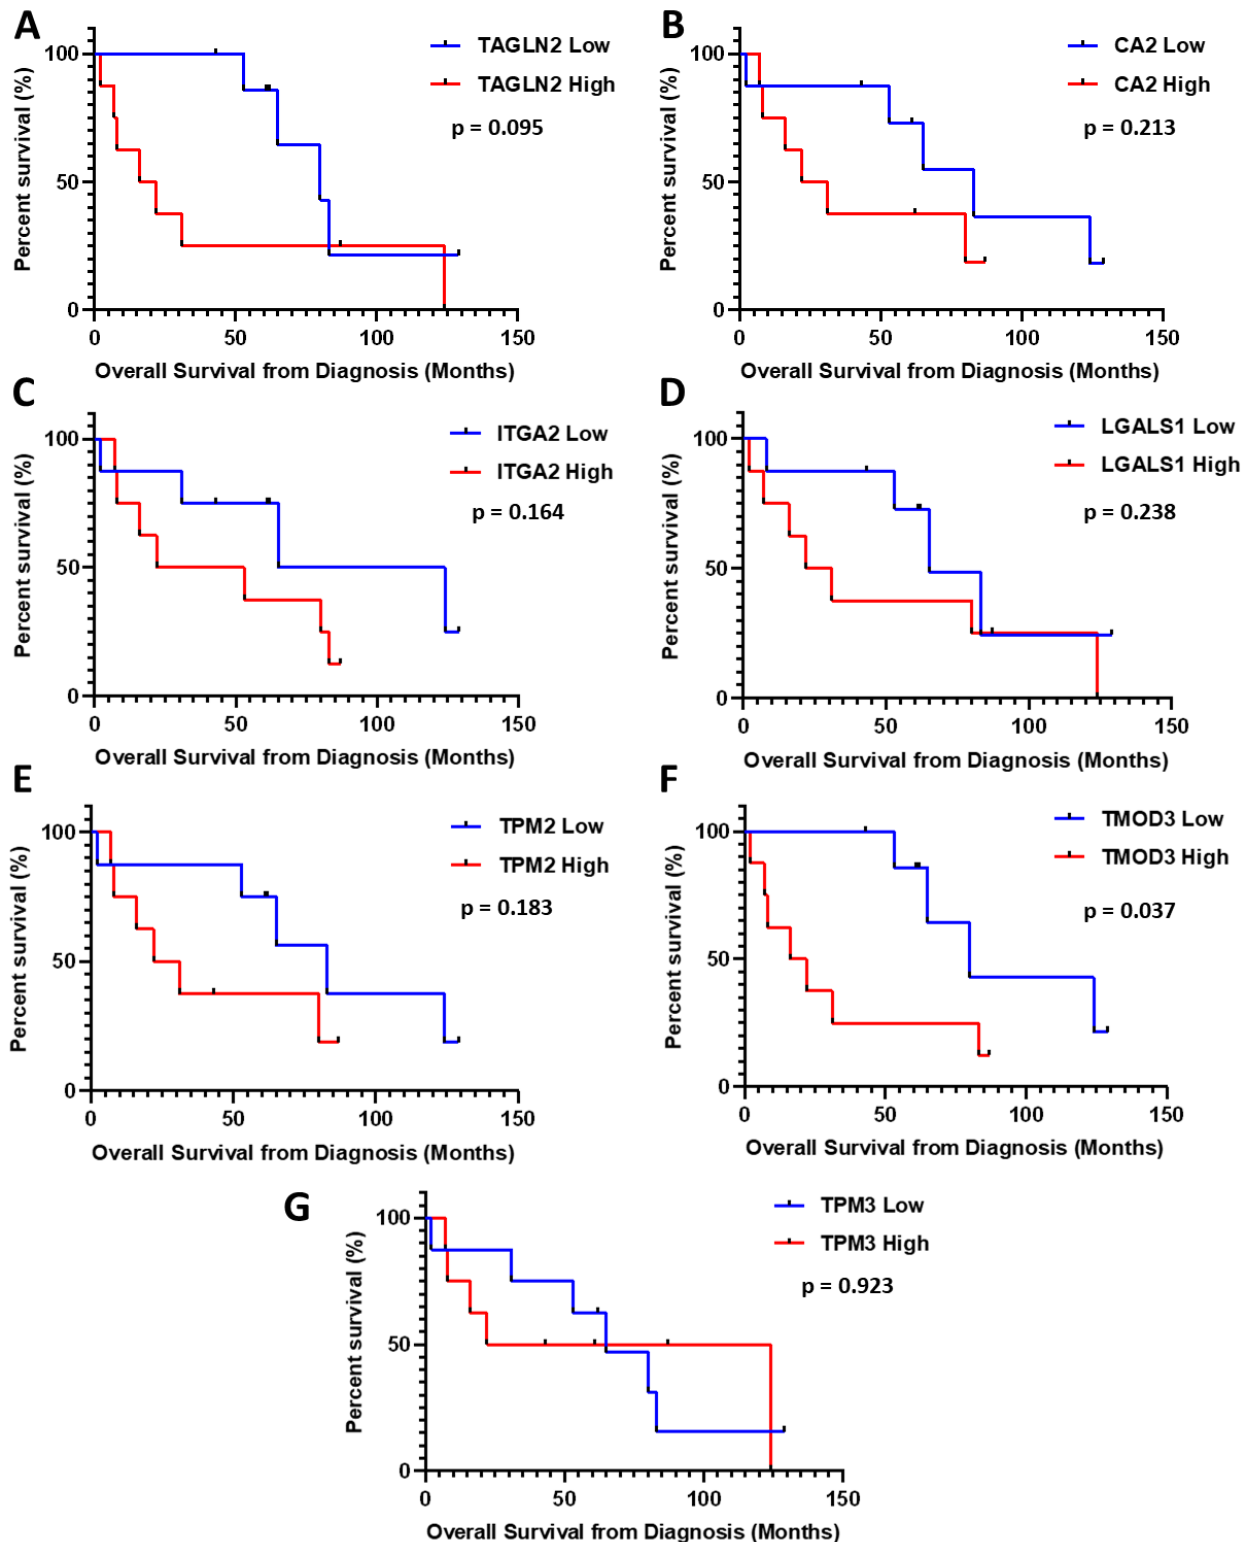

**Figure S3:** Survival graphs illustrating the difference in OS between patients with high expression and low expression of the seven proteins identified as potential prognostic biomarkers in the CoMMpass dataset. Samples were divided based on median expression levels. (A) TAGLN2 (B) CA2 (C) ITGA2 (D) LGALS1 (E) TPM2 (F) TMOD3 (G) TPM3.

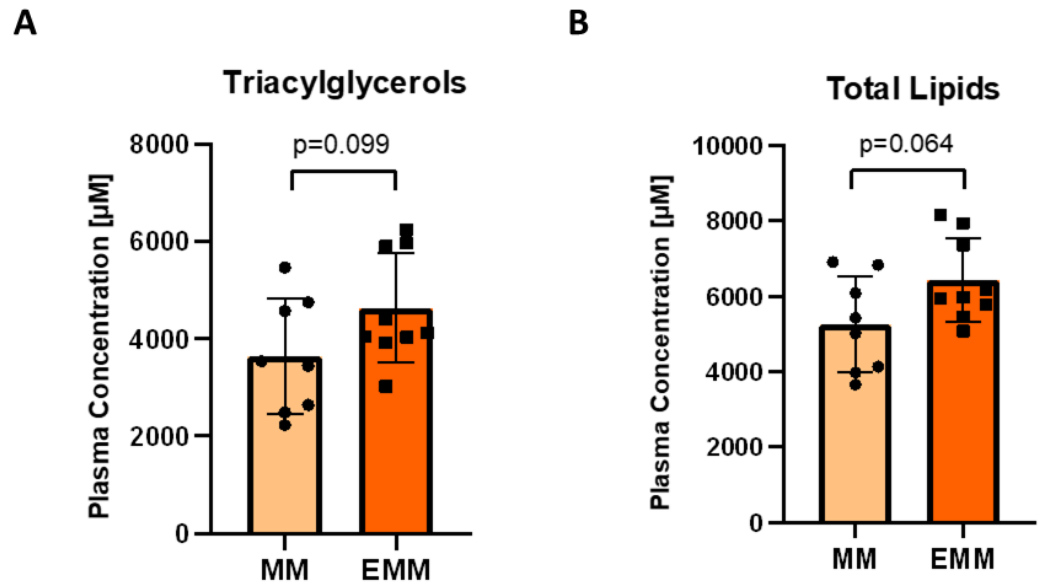

**Figure S4.** Targeted metabolomics analysis shows a trend towards increased triglycerides and lipids in the plasma of EMM patients (A) Total plasma triglyceride concentration in MM patients with and without extramedullary spread. (B) Total lipid concentration in MM patients with and without extramedullary spread.

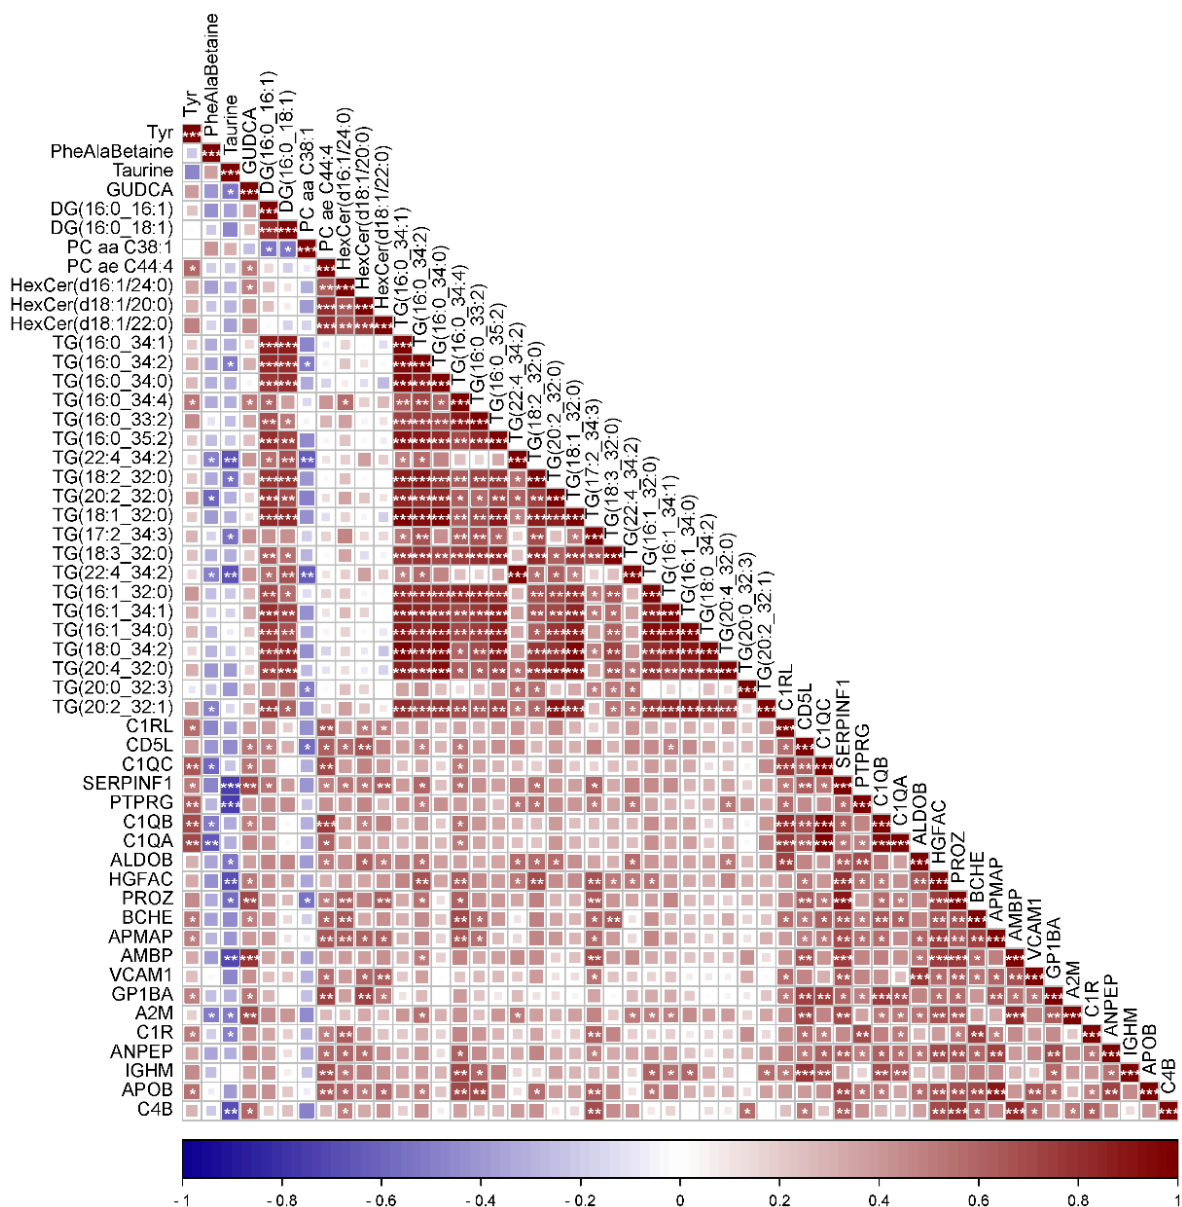

**Figure S5.** Spearman's correlation matrix between differential metabolites and proteins in plasma. Blue colour indicates negative correlation; Red colour indicates positive correlation. Significant correlations regions were marked by stars (\* $P < 0.05$ , \*\* $P < 0.01$ , \*\*\* $P < 0.001$ ).

**Table S1.** Full list of statistically significant differentially abundant (SSDA) proteins in EMM bone marrow mononuclear cells (BMNCs) and MM BMNCs.

| Protein Accession | Gene Name | Peptide Count | Anova (p) | Log2 Fold Change |
|-------------------|-----------|---------------|-----------|------------------|
| P00918            | CA2       | 2             | 0.0001    | 2.14             |
| Q8NBJ5            | COLGALT1  | 3             | 0.0003    | 0.82             |
| P22087            | FBL       | 2             | 0.0003    | -0.73            |
| P09382            | LGALS1    | 2             | 0.0005    | 0.95             |
| Q5JRX3            | PITRM1    | 2             | 0.0006    | 1.61             |
| P37802            | TAGLN2    | 8             | 0.0006    | 2.22             |
| P16402            | H1-3      | 2             | 0.0007    | -1.53            |
| Q8NBS9            | TXNDC5    | 9             | 0.0008    | -2.11            |
| P17301            | ITGA2     | 2             | 0.0009    | 5.13             |
| Q86WV6            | STING1    | 2             | 0.0009    | 1.60             |
| Q32MZ4            | LRRFIP1   | 2             | 0.0009    | 1.09             |
| Q15833            | STXBP2    | 3             | 0.0011    | 1.17             |
| P62328            | TMSB4X    | 3             | 0.0011    | 3.11             |
| Q99798            | ACO2      | 3             | 0.0012    | -0.69            |
| Q9NSE4            | IARS2     | 3             | 0.0014    | -1.15            |
| Q9Y320            | TMX2      | 2             | 0.0014    | -2.57            |
| Q13263            | TRIM28    | 2             | 0.0015    | -1.13            |
| P08567            | PLEK      | 4             | 0.0015    | 2.45             |
| P30837            | ALDH1B1   | 2             | 0.0015    | -3.03            |
| Q9BY50            | SEC11C    | 4             | 0.0016    | -2.38            |
| Q9UGT4            | SUSD2     | 2             | 0.0017    | 5.74             |
| O60610            | DIAPH1    | 5             | 0.0018    | 1.15             |
| P08758            | ANXA5     | 2             | 0.0018    | 2.94             |
| P07951            | TPM2      | 2             | 0.0019    | 1.79             |
| Q7LDG7            | RASGRP2   | 3             | 0.0019    | 1.83             |
| Q14019            | COTL1     | 5             | 0.0020    | 1.25             |
| P18054            | ALOX12    | 2             | 0.0020    | 4.73             |
| Q9NYL9            | TMOD3     | 4             | 0.0020    | 1.54             |
| Q13813            | SPTAN1    | 13            | 0.0023    | -1.07            |
| P63000            | RAC1      | 2             | 0.0025    | 1.45             |
| P37840            | SNCA      | 3             | 0.0025    | 4.21             |
| Q9HBI1            | PARVB     | 5             | 0.0026    | 3.60             |
| P18206            | VCL       | 43            | 0.0028    | 2.53             |
| Q15942            | ZYX       | 12            | 0.0029    | 2.30             |
| P06753            | TPM3      | 5             | 0.0030    | 1.05             |
| P07339            | CTSD      | 5             | 0.0032    | 0.65             |
| Q3SY69            | ALDH1L2   | 3             | 0.0033    | -2.87            |
| P08240            | SRPRA     | 2             | 0.0035    | -1.31            |
| P30044            | PRDX5     | 2             | 0.0037    | -0.83            |
| P48426            | PIP4K2A   | 5             | 0.0039    | 1.22             |
| Q9Y490            | TLN1      | 79            | 0.0041    | 2.29             |
| Q7KZF4            | SND1      | 4             | 0.0042    | -1.54            |
| Q15661            | TPSAB1    | 2             | 0.0043    | 10.23            |
| P49257            | LMAN1     | 9             | 0.0043    | -1.29            |
| Q9Y4P3            | TBL2      | 3             | 0.0045    | -2.18            |
| P09874            | PARP1     | 5             | 0.0047    | -1.42            |
| P43405            | SYK       | 2             | 0.0049    | 2.13             |
| P50552            | VASP      | 4             | 0.0050    | 1.61             |

|        |           |    |        |       |
|--------|-----------|----|--------|-------|
| P67936 | TPM4      | 12 | 0.0052 | 1.92  |
| Q01105 | SET       | 2  | 0.0054 | -1.72 |
| Q7L576 | CYFIP1    | 5  | 0.0054 | 1.24  |
| Q92506 | HSD17B8   | 2  | 0.0054 | -1.75 |
| Q04917 | YWHAH     | 4  | 0.0054 | 0.79  |
| P12235 | SLC25A4   | 4  | 0.0055 | -2.15 |
| O15117 | FYB1      | 2  | 0.0055 | 2.55  |
| Q13310 | PABPC4    | 3  | 0.0056 | -2.16 |
| O00429 | DNM1L     | 2  | 0.0057 | 2.76  |
| P53992 | SEC24C    | 2  | 0.0057 | -5.27 |
| Q16706 | MAN2A1    | 7  | 0.0058 | -2.69 |
| Q01082 | SPTBN1    | 14 | 0.0060 | -0.97 |
| Q86UX7 | FERMT3    | 14 | 0.0064 | 1.65  |
| P48059 | LIMS1     | 4  | 0.0065 | 2.52  |
| P42704 | LRPPRC    | 3  | 0.0066 | 1.58  |
| O15269 | SPTLC1    | 2  | 0.0068 | 0.66  |
| P50502 | ST13      | 3  | 0.0069 | 0.61  |
| P00387 | CYB5R3    | 2  | 0.0070 | 0.74  |
| O75116 | ROCK2     | 2  | 0.0070 | 2.86  |
| P54886 | ALDH18A1  | 3  | 0.0072 | -3.36 |
| Q9Y678 | COPG1     | 4  | 0.0073 | -1.08 |
| P53999 | SUB1      | 6  | 0.0074 | -1.62 |
| P13667 | PDIA4     | 3  | 0.0074 | -1.31 |
| P68032 | ACTC1     | 2  | 0.0075 | 1.24  |
| Q9Y251 | HPSE      | 3  | 0.0077 | 1.79  |
| Q9UHQ4 | BCAP29    | 2  | 0.0079 | 0.99  |
| Q13418 | ILK       | 7  | 0.0080 | 2.25  |
| P08236 | GUSB      | 6  | 0.0080 | -1.31 |
| Q15005 | SPCS2     | 3  | 0.0081 | -1.24 |
| P14618 | PKM       | 8  | 0.0082 | 0.90  |
| P78417 | GSTO1     | 5  | 0.0082 | 1.28  |
| O75083 | WDR1      | 9  | 0.0083 | 1.29  |
| P22314 | UBA1      | 2  | 0.0085 | -7.27 |
| Q15404 | RSU1      | 5  | 0.0085 | 1.96  |
| P02042 | HBD       | 2  | 0.0087 | 0.72  |
| Q15257 | PTPA      | 2  | 0.0087 | 0.86  |
| O00299 | CLIC1     | 7  | 0.0089 | 0.96  |
| P35555 | FBN1      | 3  | 0.0091 | -5.71 |
| Q96C24 | SYTL4     | 2  | 0.0095 | 3.18  |
| Q00610 | CLTC      | 3  | 0.0099 | 8.55  |
| P30041 | PRDX6     | 2  | 0.0100 | 1.74  |
| P63104 | YWHAZ     | 13 | 0.0102 | 0.88  |
| P22626 | HNRNPA2B1 | 5  | 0.0102 | -0.61 |
| P29350 | PTPN6     | 2  | 0.0103 | 1.44  |
| P61224 | RAP1B     | 5  | 0.0104 | 1.70  |
| P17858 | PFKL      | 4  | 0.0105 | -0.88 |
| P01011 | SERPINA3  | 10 | 0.0105 | 1.10  |
| P21333 | FLNA      | 67 | 0.0106 | 1.41  |
| Q16822 | PCK2      | 2  | 0.0108 | -2.28 |
| P00488 | F13A1     | 10 | 0.0110 | 2.05  |
| P04843 | RPN1      | 2  | 0.0112 | -0.69 |

|        |          |    |        |       |
|--------|----------|----|--------|-------|
| P69905 | HBA1     | 3  | 0.0112 | 1.01  |
| Q9UHG3 | PCYOX1   | 4  | 0.0112 | -0.83 |
| Q9H299 | SH3BGRL3 | 4  | 0.0115 | 1.14  |
| P02649 | APOE     | 2  | 0.0118 | 1.10  |
| P51991 | HNRNPA3  | 3  | 0.0120 | -0.61 |
| Q9BWS9 | CHID1    | 2  | 0.0121 | -1.56 |
| O60832 | DKC1     | 2  | 0.0123 | -0.97 |
| Q9P2E9 | RRBP1    | 5  | 0.0123 | -2.85 |
| P49736 | MCM2     | 2  | 0.0123 | 1.23  |
| P18827 | SDC1     | 2  | 0.0128 | -5.89 |
| Q92619 | ARHGAP45 | 2  | 0.0128 | 0.97  |
| P00450 | CP       | 6  | 0.0132 | 1.71  |
| Q01813 | PFKP     | 2  | 0.0134 | 1.85  |
| P08519 | LPA      | 11 | 0.0134 | 0.97  |
| P60709 | ACTB     | 17 | 0.0135 | 0.95  |
| P07195 | LDHB     | 3  | 0.0136 | 1.05  |
| Q13162 | PRDX4    | 8  | 0.0140 | -1.00 |
| P35579 | MYH9     | 50 | 0.0140 | 0.92  |
| Q9NZN3 | EHD3     | 4  | 0.0141 | 2.66  |
| Q6UW68 | TMEM205  | 2  | 0.0141 | -0.66 |
| Q9H2U2 | PPA2     | 2  | 0.0141 | -0.71 |
| O95810 | CAVIN2   | 8  | 0.0142 | 3.26  |
| P14770 | GP9      | 3  | 0.0143 | 1.73  |
| O00567 | NOP56    | 2  | 0.0145 | -0.79 |
| P04075 | ALDOA    | 3  | 0.0149 | 1.25  |
| Q9Y2Q0 | ATP8A1   | 2  | 0.0149 | 1.23  |
| P68363 | TUBA1B   | 7  | 0.0156 | 0.70  |
| Q8WU39 | MZB1     | 3  | 0.0158 | -1.67 |
| Q96I99 | SUCLG2   | 3  | 0.0159 | -0.63 |
| Q13094 | LCP2     | 2  | 0.0161 | 3.83  |
| Q6P2Q9 | PRPF8    | 2  | 0.0167 | -1.04 |
| P21291 | CSRP1    | 3  | 0.0171 | 2.12  |
| P52566 | ARHGDIB  | 4  | 0.0176 | 0.78  |
| Q01518 | CAP1     | 7  | 0.0176 | 0.70  |
| Q9UKM9 | RALY     | 2  | 0.0179 | -0.69 |
| P02654 | APOC1    | 2  | 0.0183 | 0.77  |
| P17987 | TCP1     | 2  | 0.0185 | 1.14  |
| P21796 | VDAC1    | 2  | 0.0187 | -0.69 |
| P42126 | ECI1     | 2  | 0.0187 | -1.03 |
| Q07065 | CKAP4    | 12 | 0.0191 | -0.75 |
| Q9UBW5 | BIN2     | 5  | 0.0192 | 1.06  |
| Q8N6Q3 | CD177    | 2  | 0.0194 | -2.65 |
| O43488 | AKR7A2   | 2  | 0.0195 | 1.04  |
| Q09666 | AHNAK    | 6  | 0.0198 | 0.71  |
| Q9Y2X3 | NOP58    | 2  | 0.0199 | -1.12 |
| P06702 | S100A9   | 5  | 0.0204 | -0.74 |
| Q3ZCW2 | LGALS1   | 2  | 0.0208 | 2.40  |
| P55072 | VCP      | 5  | 0.0213 | -0.70 |
| O00151 | PDLIM1   | 3  | 0.0219 | 2.66  |
| Q03252 | LMNB2    | 6  | 0.0223 | -0.69 |
| P36542 | ATP5F1C  | 2  | 0.0226 | -2.02 |

|        |          |    |        |       |
|--------|----------|----|--------|-------|
| P30085 | CMPK1    | 2  | 0.0229 | 1.26  |
| P13224 | GP1BB    | 3  | 0.0229 | 1.53  |
| P05556 | ITGB1    | 3  | 0.0231 | 1.17  |
| O75477 | ERLIN1   | 2  | 0.0234 | 0.69  |
| P04439 | HLA-A    | 2  | 0.0239 | 1.22  |
| O00506 | STK25    | 3  | 0.0241 | 1.19  |
| P02794 | FTH1     | 2  | 0.0241 | 0.80  |
| Q9ULV4 | CORO1C   | 6  | 0.0243 | 1.67  |
| P12111 | COL6A3   | 2  | 0.0244 | -2.83 |
| P02788 | LTF      | 8  | 0.0244 | -1.01 |
| P00491 | PNP      | 2  | 0.0247 | 1.37  |
| P16109 | SELP     | 3  | 0.0248 | 1.97  |
| P05109 | S100A8   | 4  | 0.0249 | -0.77 |
| Q92520 | FAM3C    | 2  | 0.0250 | -1.50 |
| Q9H4B7 | TUBB1    | 3  | 0.0251 | 2.53  |
| P53618 | COPB1    | 3  | 0.0252 | -0.59 |
| P39656 | DDOST    | 2  | 0.0252 | -0.83 |
| P12259 | F5       | 10 | 0.0252 | 1.46  |
| P16671 | CD36     | 4  | 0.0252 | 1.48  |
| Q02218 | OGDH     | 3  | 0.0252 | -0.77 |
| Q9Y3F4 | STRAP    | 2  | 0.0255 | 1.12  |
| P61353 | RPL27    | 2  | 0.0257 | -0.69 |
| O95866 | MPIG6B   | 2  | 0.0257 | 2.80  |
| P50213 | IDH3A    | 2  | 0.0264 | -1.14 |
| P16949 | STMN1    | 2  | 0.0265 | 1.04  |
| P53396 | ACLY     | 2  | 0.0268 | 0.63  |
| P35749 | MYH11    | 6  | 0.0268 | 0.79  |
| P0DP25 | CALM3    | 2  | 0.0270 | 0.78  |
| P0DMV9 | HSPA1B   | 2  | 0.0271 | 1.86  |
| P06576 | ATP5F1B  | 2  | 0.0272 | -5.29 |
| P02775 | PPBP     | 2  | 0.0277 | 1.86  |
| O43772 | SLC25A20 | 2  | 0.0283 | 1.73  |
| P05106 | ITGB3    | 15 | 0.0283 | 2.03  |
| P08514 | ITGA2B   | 13 | 0.0283 | 1.74  |
| P04275 | VWF      | 2  | 0.0284 | -2.55 |
| O76074 | PDE5A    | 2  | 0.0284 | 1.77  |
| Q0VD83 | APOBR    | 2  | 0.0284 | 1.27  |
| P07203 | GPX1     | 2  | 0.0286 | 0.66  |
| P07359 | GP1BA    | 6  | 0.0288 | 2.15  |
| Q00341 | HDLBP    | 2  | 0.0289 | -3.38 |
| Q13586 | STIM1    | 3  | 0.0290 | 1.17  |
| P14625 | HSP90B1  | 6  | 0.0298 | -1.07 |
| P60981 | DSTN     | 2  | 0.0304 | 1.83  |
| P12814 | ACTN1    | 10 | 0.0306 | 1.16  |
| Q9HCC0 | MCCC2    | 2  | 0.0306 | -3.35 |
| Q1KMD3 | HNRNPUL2 | 2  | 0.0308 | -0.74 |
| P16284 | PECAM1   | 3  | 0.0308 | 0.93  |
| P23528 | CFL1     | 3  | 0.0308 | 0.94  |
| P02652 | APOA2    | 2  | 0.0319 | 10.06 |
| O95352 | ATG7     | 2  | 0.0319 | -1.54 |
| P07996 | THBS1    | 16 | 0.0321 | 1.68  |



|        |          |   |        |       |
|--------|----------|---|--------|-------|
| P13010 | XRCC5    | 2 | 0.0324 | -1.36 |
| P27105 | STOM     | 2 | 0.0328 | 0.70  |
| P41240 | CSK      | 2 | 0.0331 | 0.81  |
| P16615 | ATP2A2   | 2 | 0.0331 | 0.61  |
| B5ME19 | EIF3CL   | 3 | 0.0342 | -0.94 |
| Q99439 | CNN2     | 2 | 0.0356 | 0.90  |
| P60660 | MYL6     | 3 | 0.0357 | 0.66  |
| O75643 | SNRNP200 | 3 | 0.0362 | -0.99 |
| Q9UHL4 | DPP7     | 2 | 0.0375 | -1.07 |
| P30405 | PPIF     | 2 | 0.0376 | 0.95  |
| P01137 | TGFB1    | 2 | 0.0388 | 1.24  |
| P12931 | SRC      | 3 | 0.0389 | 1.71  |
| P24752 | ACAT1    | 3 | 0.0392 | -1.07 |
| P31040 | SDHA     | 2 | 0.0396 | -0.77 |
| P00505 | GOT2     | 2 | 0.0397 | -0.73 |
| P35606 | COPB2    | 5 | 0.0401 | -0.77 |
| P07737 | PFN1     | 3 | 0.0402 | 0.61  |
| Q9H0U4 | RAB1B    | 2 | 0.0406 | 1.33  |
| Q86VP6 | CAND1    | 2 | 0.0420 | 3.21  |
| Q07955 | SRSF1    | 2 | 0.0420 | -0.60 |
| P68871 | HBB      | 3 | 0.0424 | 0.73  |
| O14980 | XPO1     | 2 | 0.0454 | -0.98 |
| Q13201 | MMRN1    | 2 | 0.0467 | 1.23  |
| P31146 | CORO1A   | 2 | 0.0484 | -0.91 |

**Table S2.** Metabolites with significant differential abundance in the plasma of MM and EMM patients. Statistically significantly differentially abundant metabolites ( $p > 0.05$ ,  $FC > 1.2$  or  $< 0.833$ ,  $VIP > 1$ ).

| Metabolite         | Compound Class       | Fold Change (EMM/MM) | VIP   | P-value |
|--------------------|----------------------|----------------------|-------|---------|
| TG(22:4_32:0)      | Triacylglycerol      | 2.341                | 2.500 | 0.001   |
| TG(16:0_34:2)      | Triacylglycerol      | 1.701                | 2.301 | 0.003   |
| HexCer(d18:1/20:0) | Hexosylceramide      | 1.732                | 2.261 | 0.004   |
| TG(18:2_32:0)      | Triacylglycerol      | 1.658                | 2.252 | 0.005   |
| Taurine            | Amino acid - related | 0.547                | 2.235 | 0.006   |
| TG(16:0_34:1)      | Triacylglycerol      | 1.813                | 2.120 | 0.008   |
| TG(20:2_32:0)      | Triacylglycerol      | 1.860                | 2.145 | 0.008   |
| HexCer(d16:1/24:0) | Hexosylceramide      | 1.843                | 2.124 | 0.009   |
| PC aa C38:1        | Phosphatidylcholine  | 0.486                | 1.989 | 0.011   |
| TG(18:1_32:0)      | Triacylglycerol      | 1.680                | 1.987 | 0.014   |
| TG(22:4_34:2)      | Triacylglycerol      | 1.534                | 1.971 | 0.015   |
| DG(16:0_16:1)      | Diacylglycerol       | 1.743                | 1.915 | 0.018   |
| TG(18:3_32:0)      | Triacylglycerol      | 1.605                | 1.921 | 0.020   |
| TG(17:2_34:3)      | Triacylglycerol      | 1.818                | 1.761 | 0.026   |
| TG(16:1_32:0)      | Triacylglycerol      | 2.429                | 1.839 | 0.027   |
| TG(16:1_34:1)      | Triacylglycerol      | 1.552                | 1.808 | 0.028   |
| PheAlaBetaine      | Amino acid - related | 0.673                | 1.838 | 0.030   |
| DG(16:0_18:1)      | Diacylglycerol       | 1.481                | 1.800 | 0.031   |
| TG(16:0_34:0)      | Triacylglycerol      | 1.845                | 1.781 | 0.033   |
| TG(16:0_34:4)      | Triacylglycerol      | 1.472                | 1.822 | 0.033   |
| TG(16:1_34:0)      | Triacylglycerol      | 1.693                | 1.750 | 0.034   |
| TG(18:0_34:2)      | Triacylglycerol      | 1.448                | 1.752 | 0.036   |

|                    |                     |       |       |       |
|--------------------|---------------------|-------|-------|-------|
| TG(20:4_32:0)      | Triacylglycerol     | 2.010 | 1.752 | 0.037 |
| GUDCA              | Bile acid           | 3.623 | 1.855 | 0.037 |
| HexCer(d18:1/22:0) | Hexosylceramide     | 1.437 | 1.820 | 0.037 |
| PC ae C44:4        | Phosphatidylcholine | 1.489 | 1.769 | 0.041 |
| TG(16:0_35:2)      | Triacylglycerol     | 1.377 | 1.726 | 0.042 |
| TG(16:0_33:2)      | Triacylglycerol     | 1.499 | 1.769 | 0.043 |
| TG(20:2_32:1)      | Triacylglycerol     | 1.389 | 1.706 | 0.044 |
| TG(20:0_32:3)      | Triacylglycerol     | 1.528 | 1.559 | 0.046 |
| Tyr                | Amino acid          | 1.432 | 1.815 | 0.048 |
